# Supplementary material
Source: PubMed Central journal article supplement (PMC3775935)
Supplement: NIHMS479764-supplement-Supp_Material.pdf [file NIHMS479764-supplement-Supp_Material.pdf]

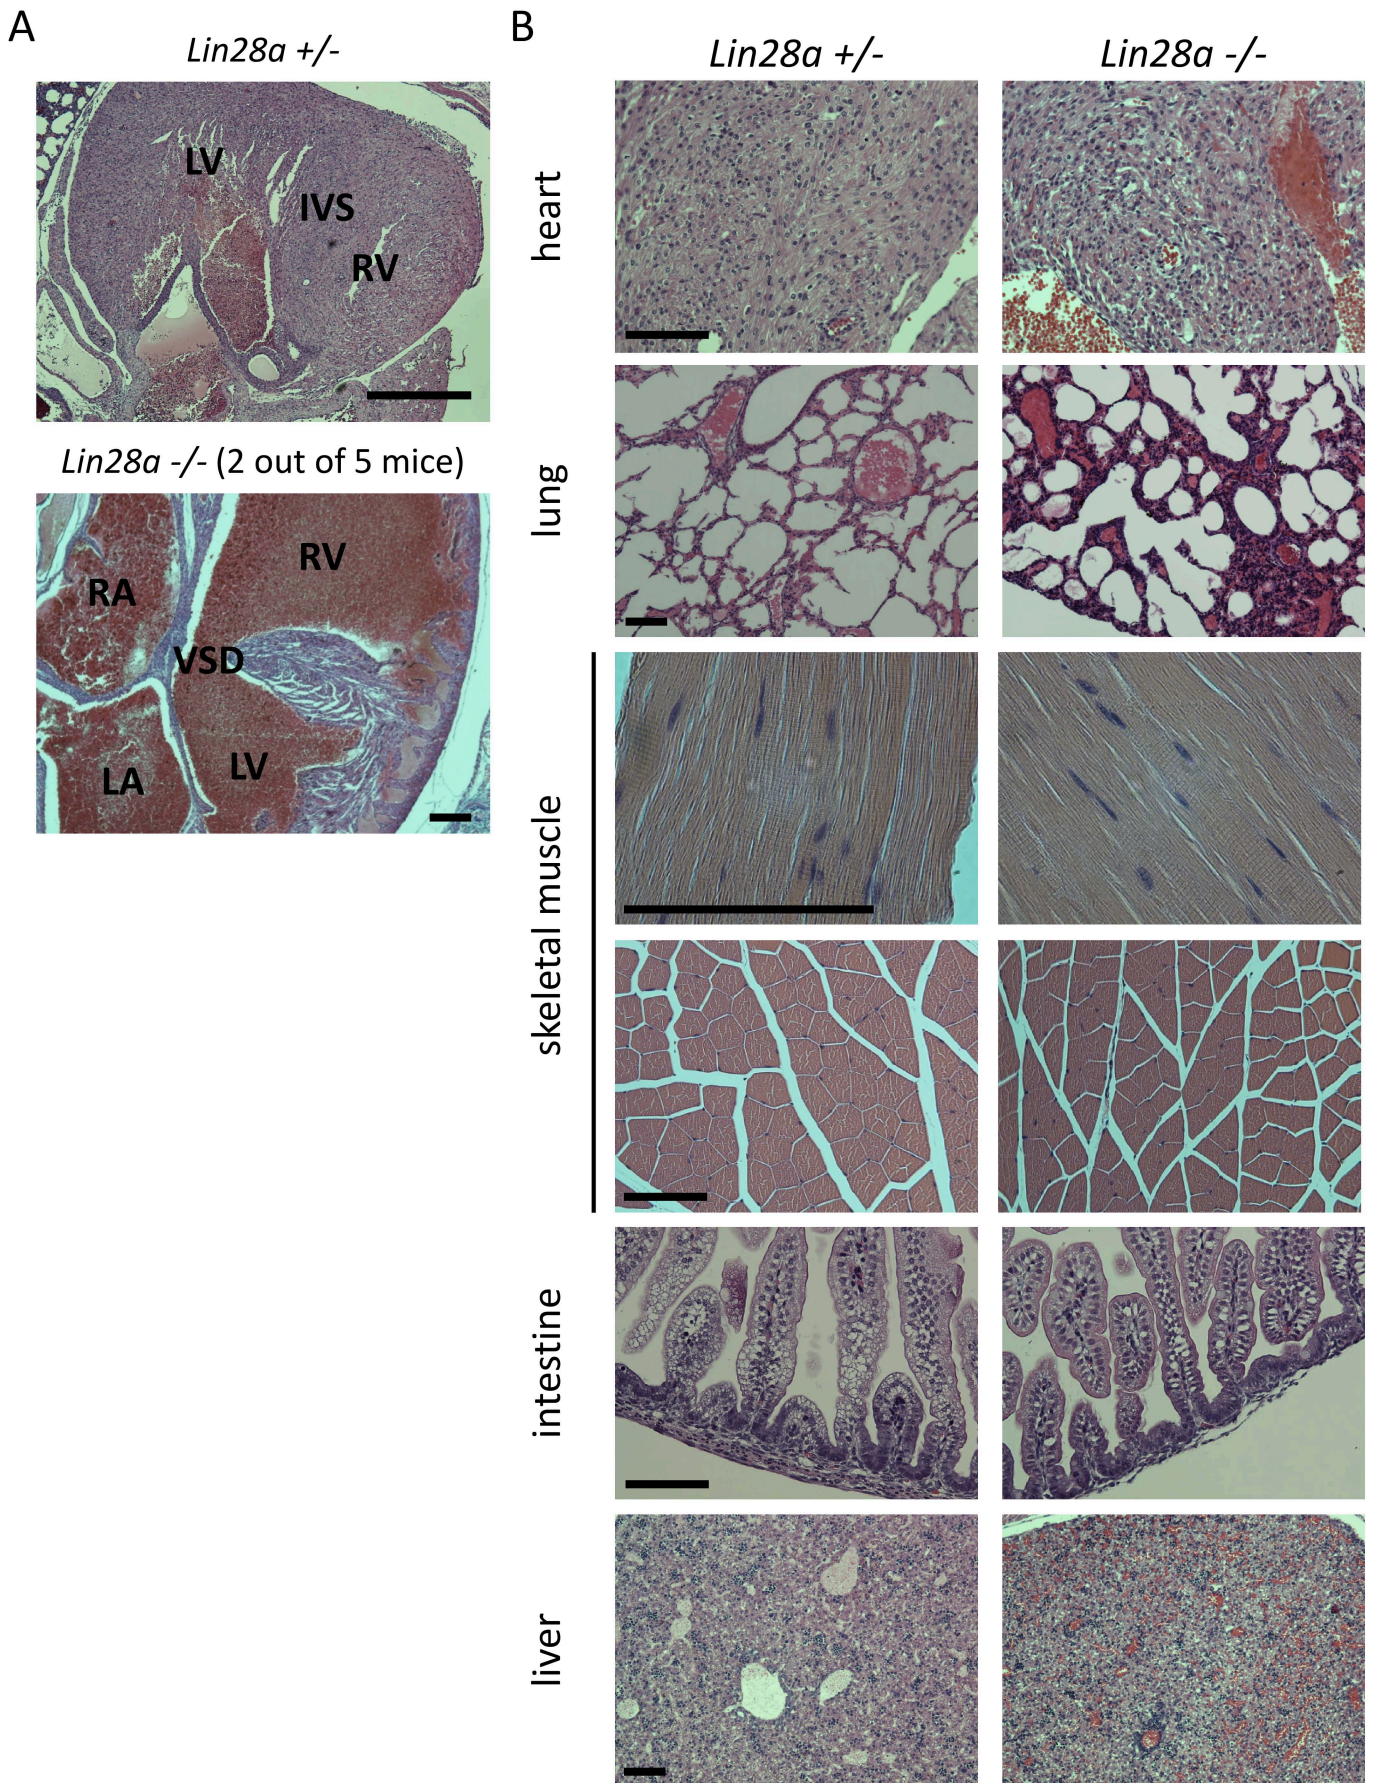

George Daley, Supplementary Fig. 1



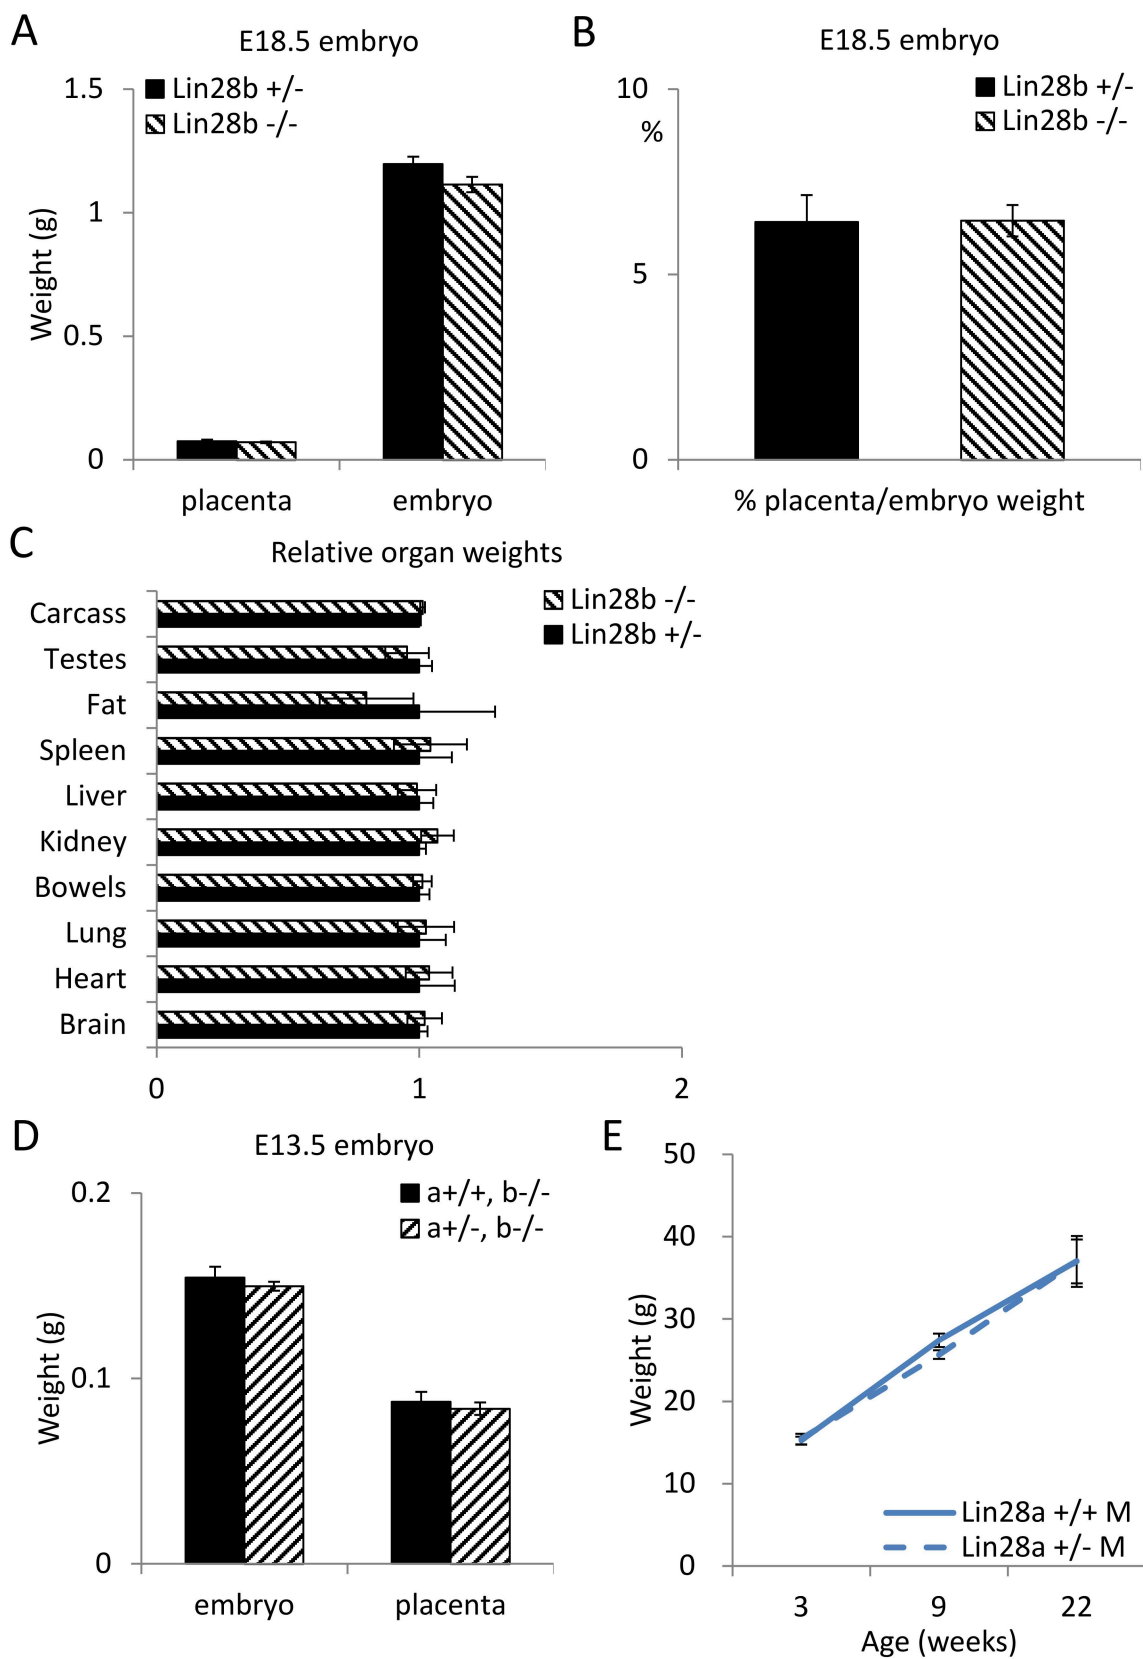

George Daley, Supplementary Fig. 3

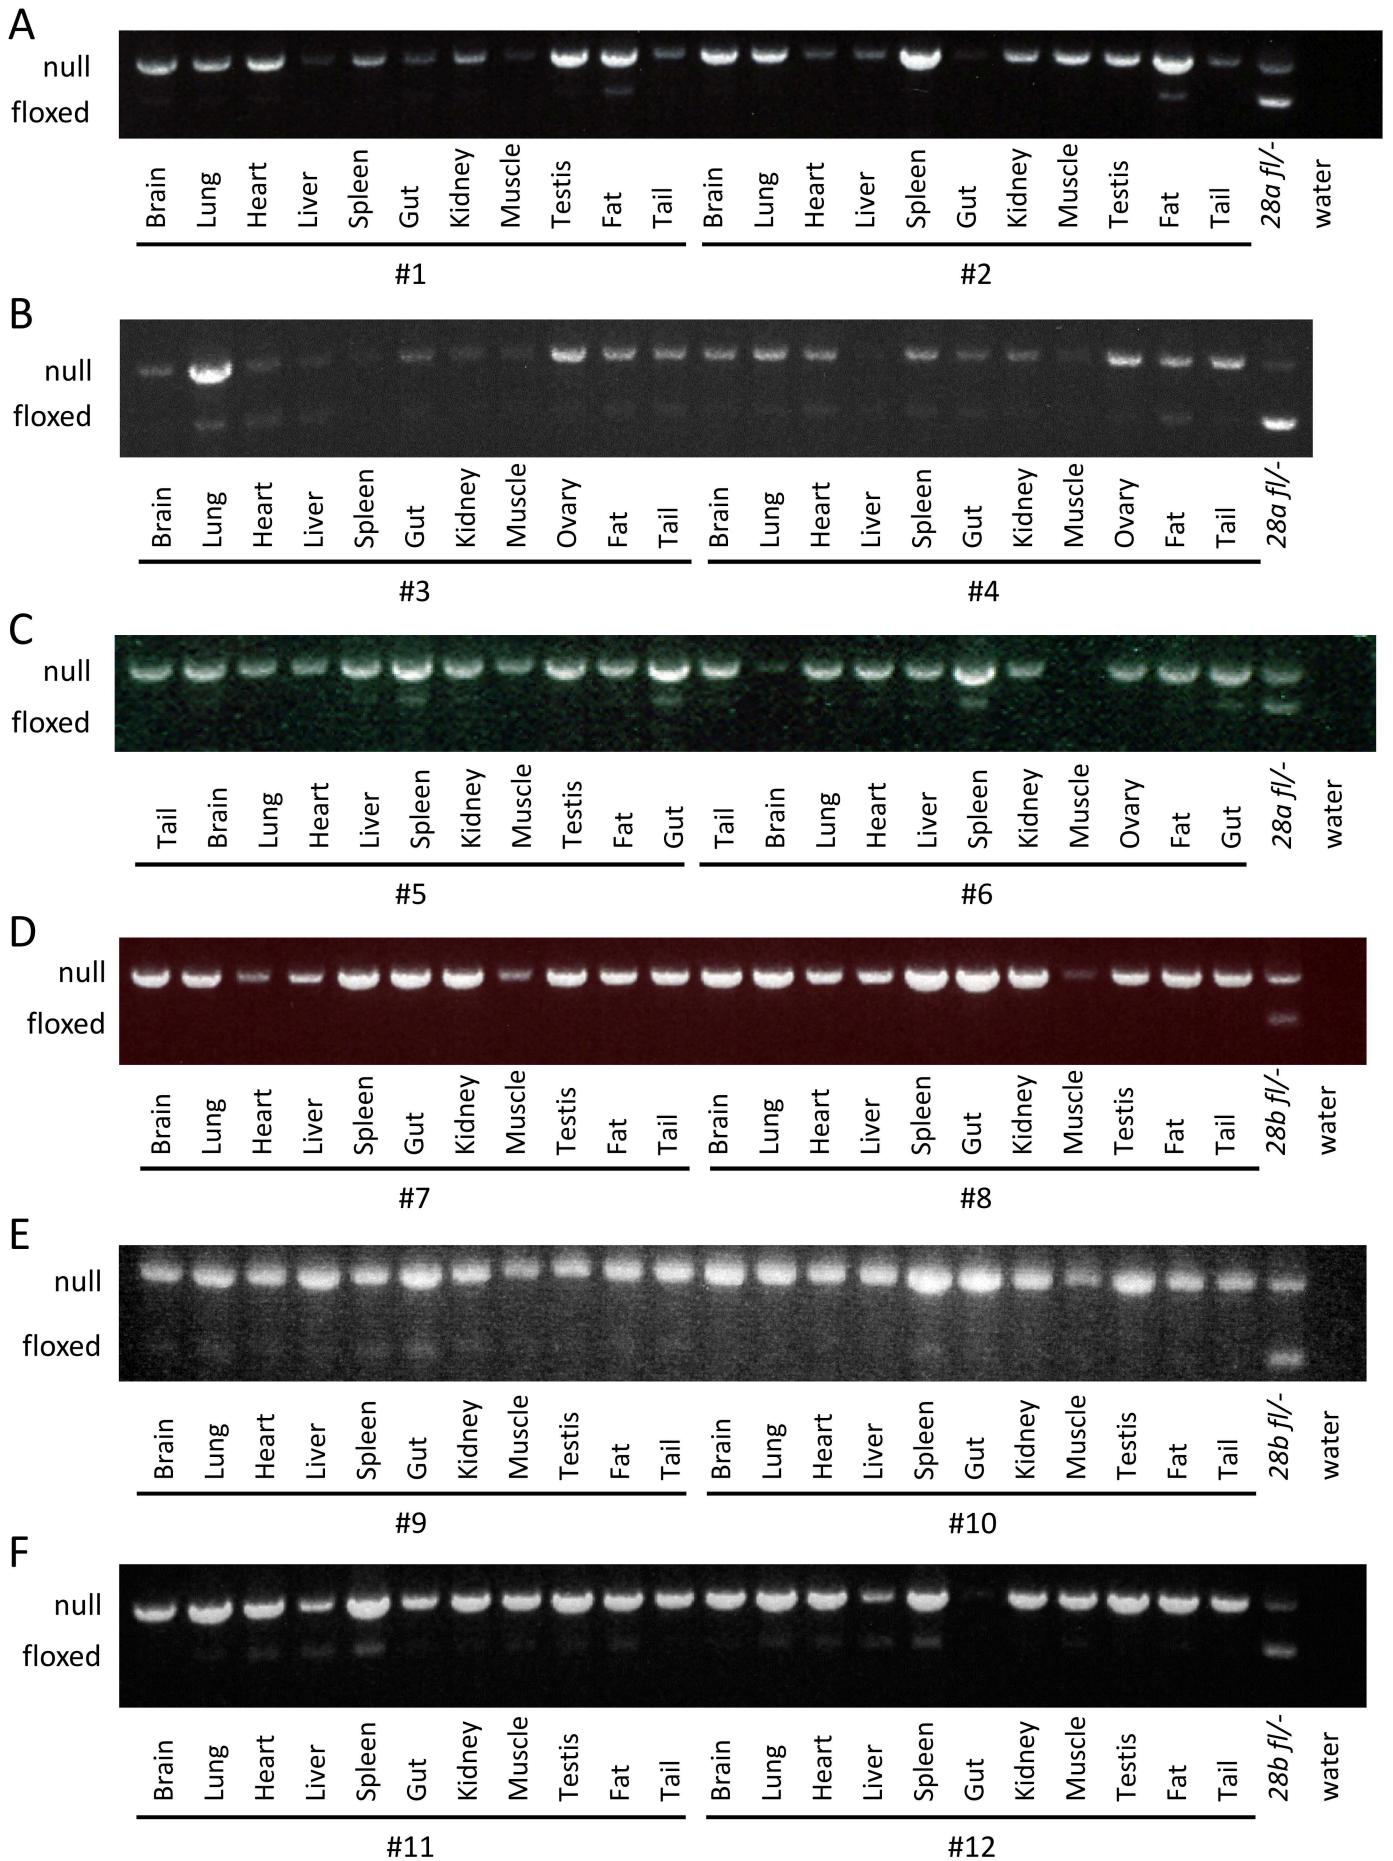

George Daley, Supplementary Fig. 4

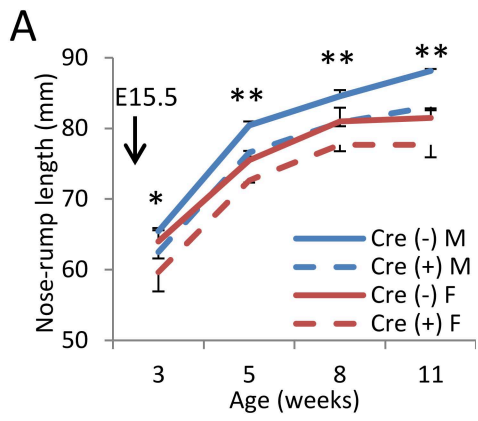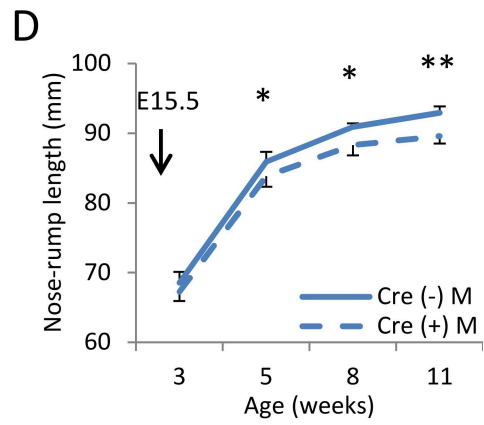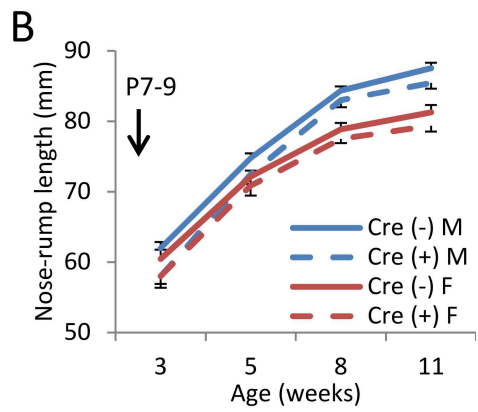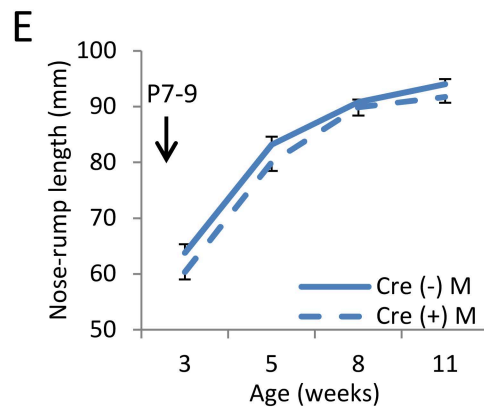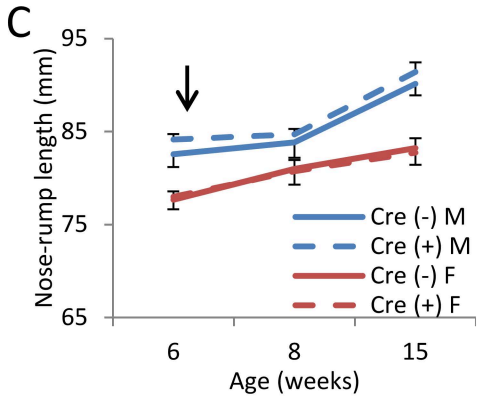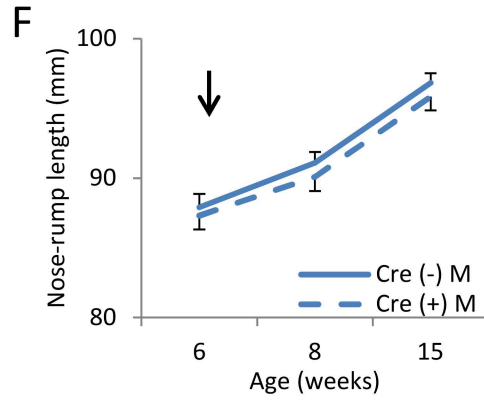

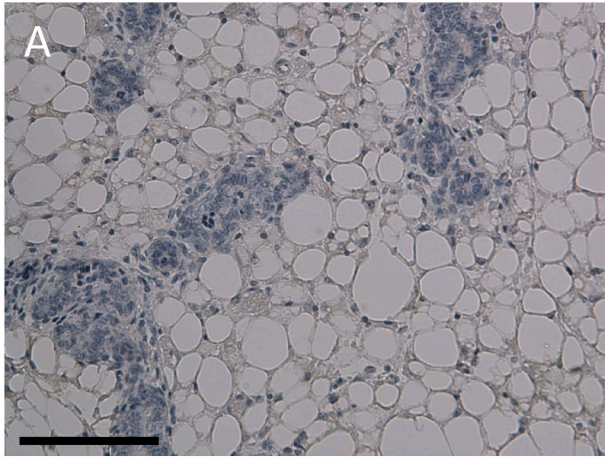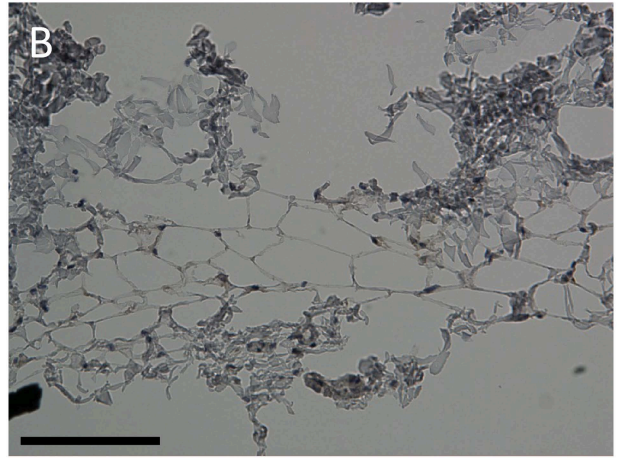

George Daley, Supplementary Fig. 6

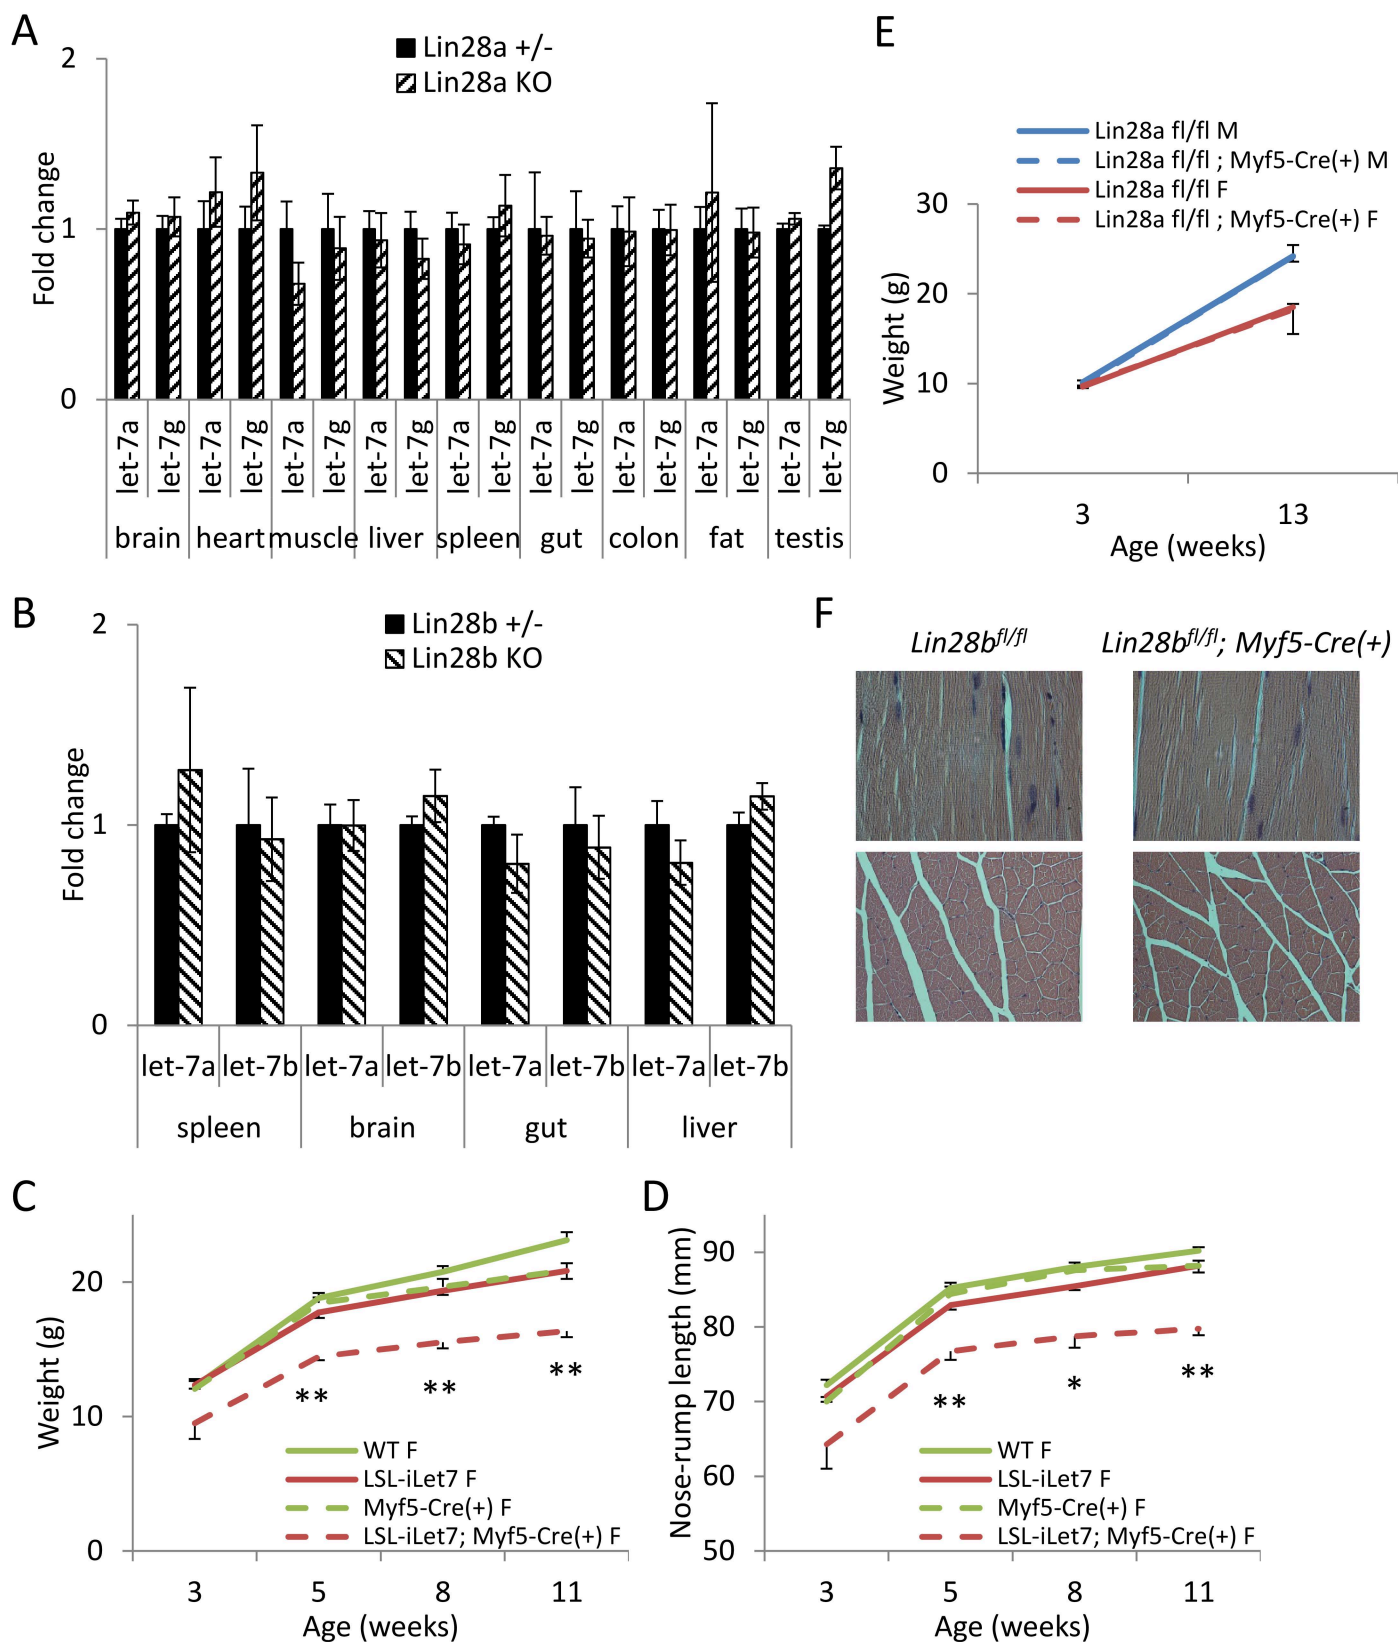

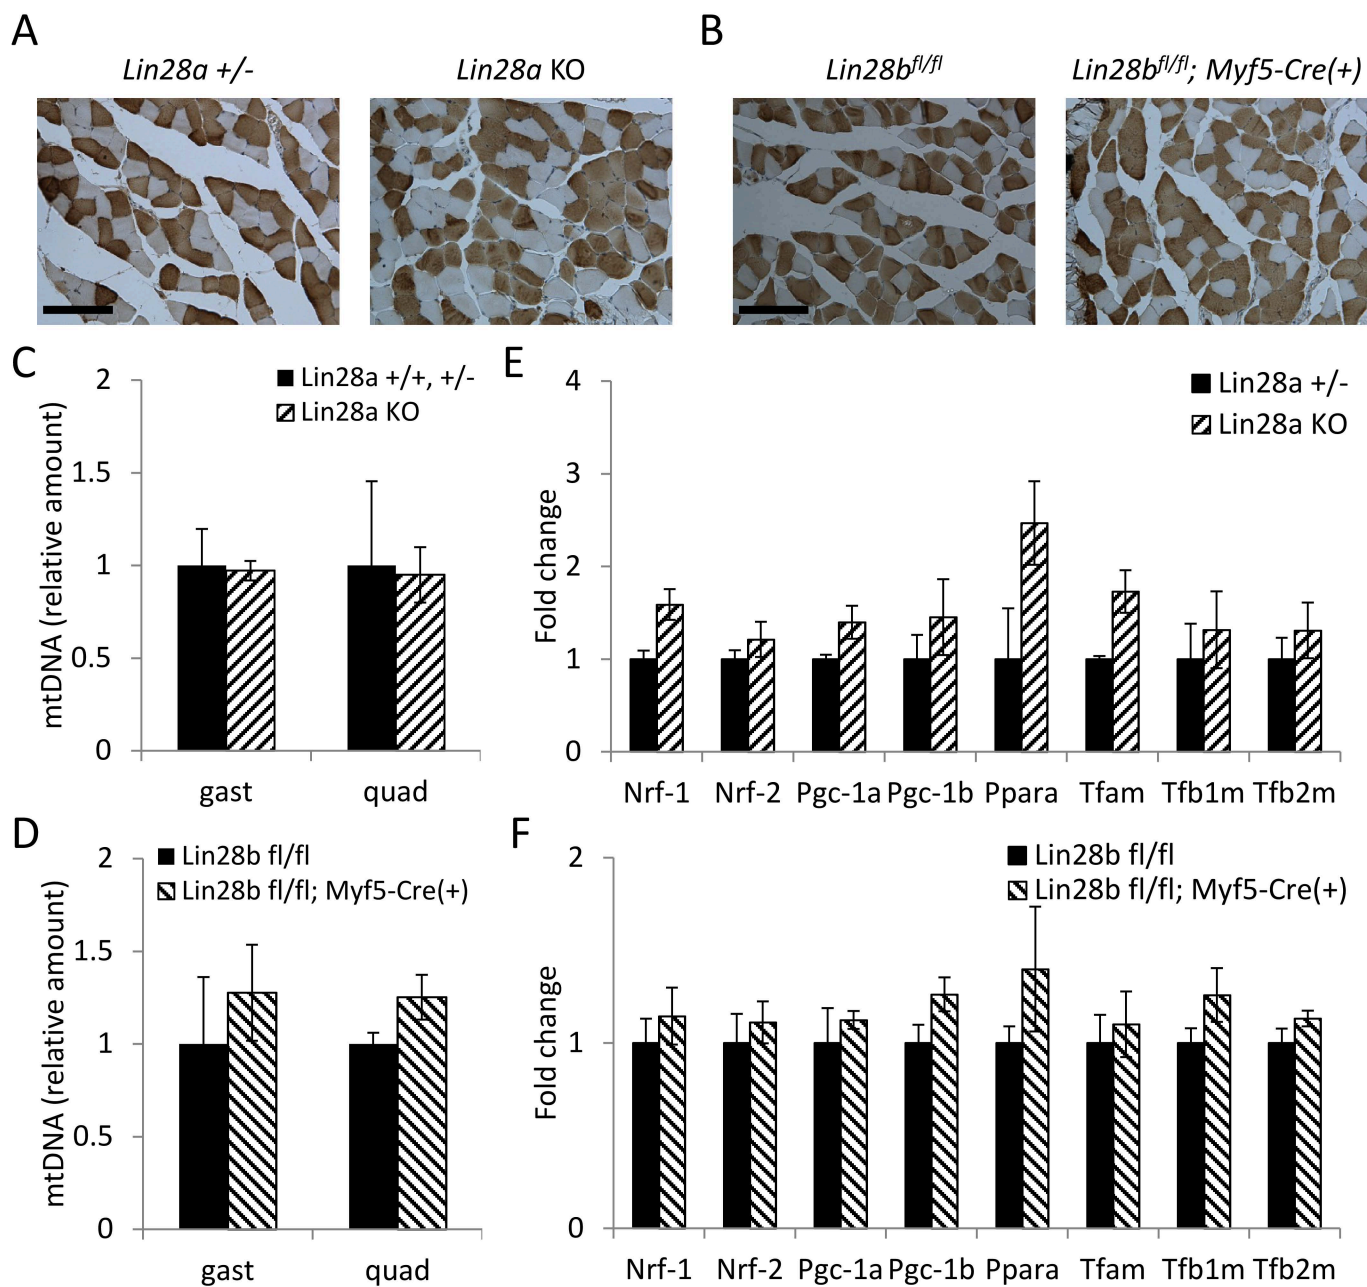



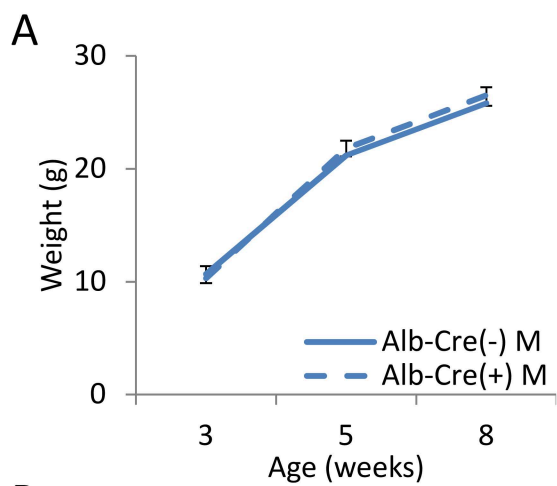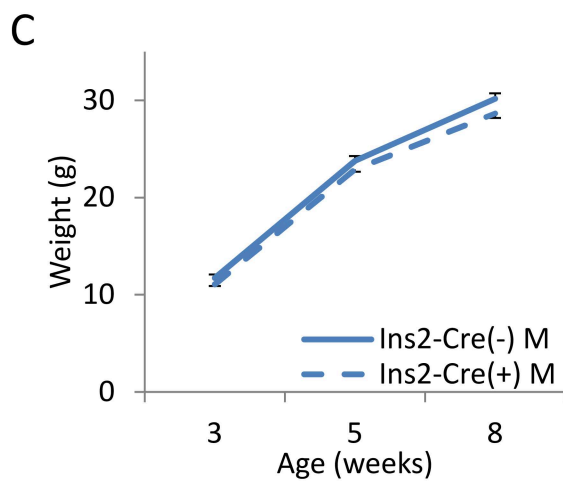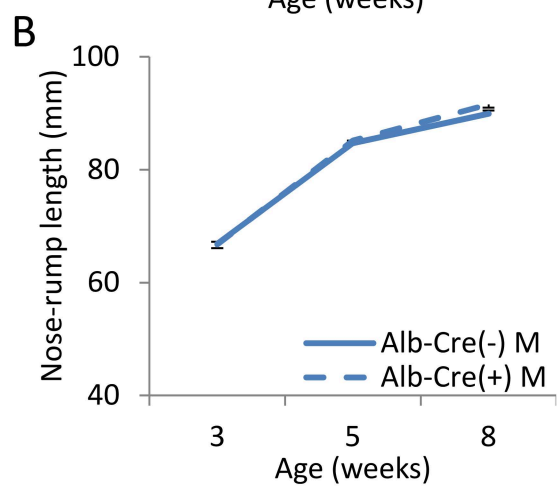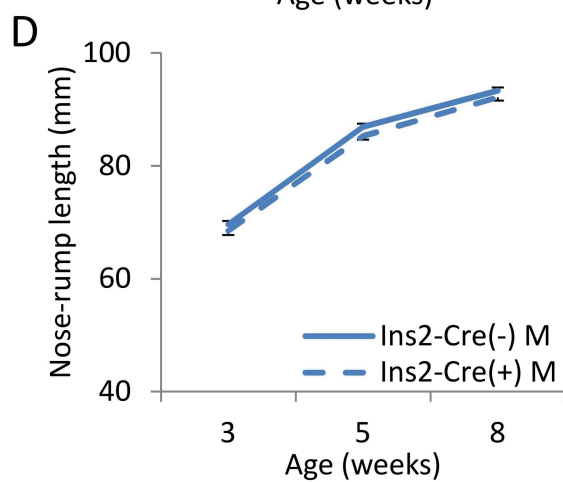

A

*Lin28b* locus

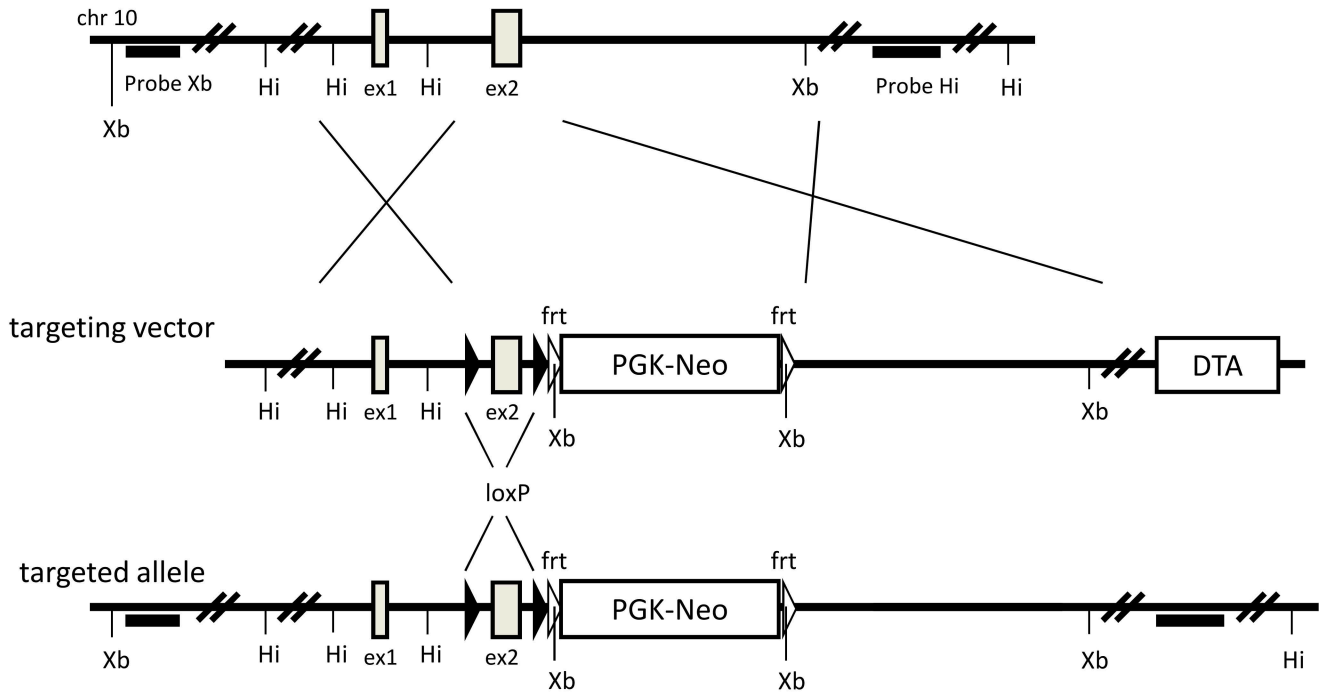

B

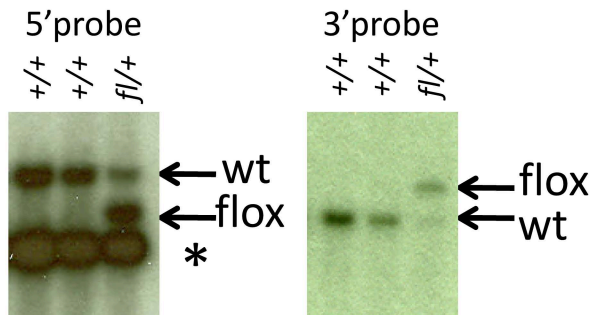

C

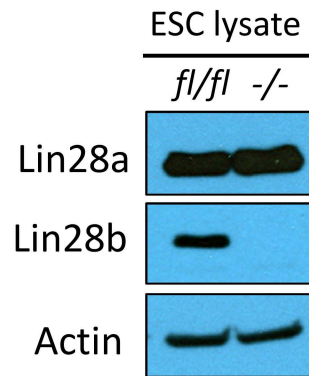

D

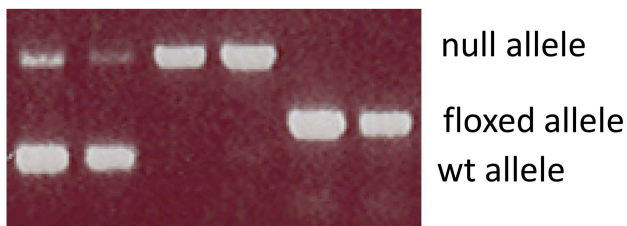

| Embryonic day | <i>a</i> +/ <i>+</i> <i>b</i> -/- | <i>a</i> +/- <i>b</i> -/- | <i>a</i> -/- <i>b</i> -/- | resorbed | p value |
|---------------|-----------------------------------|---------------------------|---------------------------|----------|---------|
| 8.5           | 8                                 | 13                        | 7                         | 0        | 0.9421  |
| 9.5           | 9                                 | 29                        | 14(1)                     | 3        | 0.6768  |
| 10.5          | 27                                | 64(3)                     | 16                        | 2        | 0.2065  |
| 11.0          | 7                                 | 12                        | 3                         | 1        | 0.6285  |
| 11.5          | 8                                 | 15                        | 14(11)                    | 2        | 0.4702  |
| 12.5          | 6                                 | 18                        | 4(4)                      | 3        | 0.0273  |
| 13.5          | 9                                 | 15                        | 1(1)                      | 1        | 0.0364  |
